# Supplementary material for: A systematic review of clinical psychological guidance for perinatal mental health
Source: Springer Nature journal article supplement (doi:10.1186/s12888-023-05173-1), 2023-10-30
Supplement: MOESM1 [file 26240424]

**Supplementary Table 1: Guideline recommendation themes and associated subcategories for psychological assessment and intervention in perinatal period.**

| No.           | Theme and recommendation category                  | <i>Antenatal Assessment</i> |                     |          | <i>Antenatal Intervention</i> |                      |          | <i>Postnatal Assessment</i> |                      |          | <i>Postnatal Intervention</i> |                      |          | % coverage |
|---------------|----------------------------------------------------|-----------------------------|---------------------|----------|-------------------------------|----------------------|----------|-----------------------------|----------------------|----------|-------------------------------|----------------------|----------|------------|
|               |                                                    | Women                       | Mother -infant dyad | Partners | Women                         | Mother - infant dyad | Partners | Women                       | Mother - infant dyad | Partners | Women                         | Mother - infant dyad | Partners |            |
| <b>1</b>      | <i>Therapeutic approaches in perinatal context</i> |                             |                     |          |                               |                      |          |                             |                      |          |                               |                      |          |            |
|               | Psychosocial                                       | ✓✓                          | ✓                   | -        | ✓                             | -                    | -        | ✓✓                          | -                    | -        | ✓                             | -                    | -        | 29         |
|               | Structured psychological                           | ✓                           | -                   | -        | ✓                             | -                    | -        | ✓                           | -                    | -        | ✓                             | ✓                    | ✓        | 25         |
|               | Focus on specific MH conditions                    | ✓✓                          | -                   | -        | ✓✓                            | -                    | -        | ✓✓                          | -                    | -        | ✓                             | -                    | -        | 29         |
|               | Trauma-informed                                    | -                           | -                   | -        | -                             | -                    | -        | -                           | -                    | -        | -                             | -                    | -        | 0          |
|               | Use of validated questionnaires                    | ✓✓                          | -                   | -        | -                             | -                    | -        | ✓✓                          | -                    | -        | -                             | -                    | -        | 17         |
|               | <i>Equitable care considerations</i>               |                             |                     |          |                               |                      |          |                             |                      |          |                               |                      |          |            |
|               | Therapeutic relationship                           | -                           | -                   | -        | ✓                             | -                    | -        | -                           | -                    | -        | ✓                             | -                    | -        | 8          |
|               | Cultural/diversity                                 | ✓                           | -                   | -        | ✓                             | -                    | -        | ✓                           | -                    | -        | ✓                             | -                    | -        | 17         |
|               | Environmental **                                   | ✓                           | -                   | -        | ✓                             | -                    | -        | ✓                           | -                    | -        | ✓                             | -                    | -        | 17         |
|               | <i>Individual and systemic considerations</i>      |                             |                     |          |                               |                      |          |                             |                      |          |                               |                      |          |            |
|               | Recovery-oriented                                  | -                           | -                   | -        | -                             | -                    | -        | -                           | -                    | -        | -                             | -                    | -        | 0          |
|               | Care planning                                      | ✓                           | -                   | -        | ✓                             | -                    | -        | ✓                           | -                    | -        | ✓                             | -                    | -        | 17         |
|               | Involve significant others                         | -                           | -                   | -        | -                             | -                    | -        | -                           | -                    | -        | -                             | -                    | ✓        | 4          |
| Safety / Risk | ✓                                                  | -                           | -                   | ✓        | -                             | -                    | ✓        | -                           | -                    | ✓        | -                             | -                    | 17       |            |
| <b>2</b>      | <i>Therapeutic approaches in perinatal context</i> |                             |                     |          |                               |                      |          |                             |                      |          |                               |                      |          |            |
|               | Psychosocial                                       | ✓✓                          | ✓                   | ✓        | ✓✓                            | -                    | -        | ✓✓                          | ✓✓                   | ✓✓       | ✓✓                            | -                    | -        | 58         |
|               | Structured psychological                           | ✓                           | -                   | ✓        | ✓✓                            | ✓✓                   | ✓✓       | ✓                           | -                    | ✓        | ✓✓                            | ✓✓                   | ✓✓       | 67         |

| No.                                           | Theme and recommendation category                  | Antenatal Assessment |                     |          | Antenatal Intervention |                      |          | Postnatal Assessment |                      |          | Postnatal Intervention |                      |          | % coverage |
|-----------------------------------------------|----------------------------------------------------|----------------------|---------------------|----------|------------------------|----------------------|----------|----------------------|----------------------|----------|------------------------|----------------------|----------|------------|
|                                               |                                                    | Women                | Mother -infant dyad | Partners | Women                  | Mother - infant dyad | Partners | Women                | Mother - infant dyad | Partners | Women                  | Mother - infant dyad | Partners |            |
|                                               | Focus on specific MH conditions                    | ✓✓                   | ✓                   | ✓✓       | ✓                      | -                    | ✓        | ✓✓                   | ✓                    | ✓✓       | ✓                      | -                    | ✓        | 58         |
|                                               | Trauma-informed                                    | -                    | -                   | -        | -                      | -                    | -        | -                    | -                    | -        | -                      | -                    | -        | 0          |
|                                               | Use of validated questionnaires                    | ✓✓                   | -                   | ✓        | -                      | -                    | -        | ✓✓                   | -                    | ✓        | -                      | -                    | -        | 25         |
| <i>Equitable care considerations</i>          |                                                    |                      |                     |          |                        |                      |          |                      |                      |          |                        |                      |          |            |
|                                               | Therapeutic relationship                           | -                    | -                   | -        | -                      | -                    | -        | -                    | -                    | -        | -                      | -                    | -        | 0          |
|                                               | Cultural/diversity                                 | ✓                    | -                   | -        | -                      | -                    | -        | ✓                    | -                    | -        | -                      | -                    | -        | 8          |
|                                               | Environmental **                                   | ✓✓                   | -                   | ✓        | -                      | -                    | -        | ✓✓                   | -                    | ✓        | -                      | -                    | -        | 25         |
| <i>Individual and systemic considerations</i> |                                                    |                      |                     |          |                        |                      |          |                      |                      |          |                        |                      |          |            |
|                                               | Recovery-oriented                                  | -                    | -                   | -        | -                      | -                    | -        | -                    | -                    | -        | -                      | -                    | -        | 0          |
|                                               | Care planning                                      | ✓                    | -                   | -        | ✓                      | ✓                    | ✓        | -                    | -                    | -        | ✓✓                     | ✓                    | ✓        | 33         |
|                                               | Involve significant others                         | -                    | -                   | -        | -                      | -                    | -        | -                    | -                    | -        | -                      | -                    | -        | 0          |
|                                               | Safety / Risk                                      | ✓✓                   | ✓✓                  | -        | ✓✓                     | ✓✓                   | -        | ✓✓                   | ✓✓                   | -        | ✓✓                     | ✓✓                   | -        | 67         |
| <b>3</b>                                      | <i>Therapeutic approaches in perinatal context</i> |                      |                     |          |                        |                      |          |                      |                      |          |                        |                      |          |            |
|                                               | Psychosocial                                       | ✓✓                   | ✓                   | ✓        | ✓✓                     | ✓                    | ✓        | ✓✓                   | ✓                    | ✓✓       | ✓✓                     | ✓                    | ✓        | 71         |
|                                               | Structured psychological                           | ✓✓                   | ✓✓                  | -        | ✓✓                     | ✓                    | ✓        | ✓✓                   | ✓✓                   | -        | ✓✓                     | ✓                    | ✓        | 67         |
|                                               | Focus on specific MH conditions                    | ✓✓                   | ✓                   | ✓        | ✓✓                     | ✓                    | -        | ✓✓                   | ✓                    | ✓        | ✓✓                     | ✓                    | -        | 58         |
|                                               | Trauma-informed                                    | ✓✓                   | ✓                   | ✓        | ✓✓                     | ✓                    | ✓        | ✓✓                   | ✓                    | ✓        | ✓✓                     | ✓                    | ✓        | 67         |
|                                               | Use of validated questionnaires                    | ✓✓                   | ✓                   | ✓        | ✓                      | ✓                    | -        | ✓✓                   | ✓                    | ✓        | ✓                      | ✓                    | -        | 50         |

| No.      | Theme and recommendation category                  | <i>Antenatal Assessment</i> |                     |          | <i>Antenatal Intervention</i> |                      |          | <i>Postnatal Assessment</i> |                      |          | <i>Postnatal Intervention</i> |                      |          | % coverage |
|----------|----------------------------------------------------|-----------------------------|---------------------|----------|-------------------------------|----------------------|----------|-----------------------------|----------------------|----------|-------------------------------|----------------------|----------|------------|
|          |                                                    | Women                       | Mother -infant dyad | Partners | Women                         | Mother - infant dyad | Partners | Women                       | Mother - infant dyad | Partners | Women                         | Mother - infant dyad | Partners |            |
|          | <i>Equitable care considerations</i>               |                             |                     |          |                               |                      |          |                             |                      |          |                               |                      |          |            |
|          | Therapeutic relationship                           | ✓✓                          | ✓                   | ✓        | ✓✓                            | ✓                    | ✓        | ✓✓                          | ✓                    | ✓        | ✓✓                            | ✓                    | ✓        | 67         |
|          | Cultural/diversity                                 | ✓✓                          | ✓                   | ✓✓       | ✓✓                            | ✓                    | ✓✓       | ✓✓                          | ✓                    | ✓✓       | ✓✓                            | ✓                    | ✓✓       | 83         |
|          | Environmental **                                   | ✓✓                          | ✓                   | ✓        | ✓                             | -                    | ✓***     | ✓✓                          | ✓                    | ✓        | ✓                             | ✓                    | ✓***     | 54         |
|          | <i>Individual and systemic considerations</i>      |                             |                     |          |                               |                      |          |                             |                      |          |                               |                      |          |            |
|          | Recovery-oriented                                  | ✓✓                          | ✓                   | -        | ✓✓                            | ✓                    | -        | ✓✓                          | ✓                    | -        | ✓✓                            | ✓                    | -        | 50         |
|          | Care planning                                      | ✓✓                          | ✓                   | -        | ✓✓                            | ✓                    | -        | ✓✓                          | ✓                    | -        | ✓✓                            | ✓                    | -        | 50         |
|          | Involve significant others                         | ✓                           | ✓                   | -        | ✓                             | ✓                    | -        | ✓                           | ✓                    | -        | ✓                             | ✓                    | -        | 33         |
|          | Safety / Risk                                      | ✓✓                          | ✓✓                  | -        | ✓✓                            | ✓✓                   | -        | ✓✓                          | ✓✓                   | -        | ✓✓                            | ✓✓                   | -        | 67         |
| <b>4</b> | <i>Therapeutic approaches in perinatal context</i> |                             |                     |          |                               |                      |          |                             |                      |          |                               |                      |          |            |
|          | Psychosocial                                       | ✓                           | -                   | -        | ✓✓                            | -                    | -        | ✓                           | -                    | -        | ✓✓                            | -                    | -        | 25         |
|          | Structured psychological                           | ✓✓                          | -                   | -        | ✓✓                            | -                    | -        | ✓✓                          | -                    | -        | ✓✓                            | -                    | -        | 33         |
|          | Focus on specific MH conditions                    | ✓                           | -                   | -        | ✓                             | -                    | -        | ✓                           | -                    | -        | ✓                             | -                    | -        | 17         |
|          | Trauma-informed                                    | ✓✓                          | -                   | -        | ✓                             | -                    | -        | ✓✓                          | -                    | -        | ✓                             | -                    | -        | 25         |
|          | Use of validated questionnaires                    | ✓                           | -                   | -        | -                             | -                    | -        | ✓                           | -                    | -        | -                             | -                    | -        | 8          |
|          | <i>Equitable care considerations</i>               |                             |                     |          |                               |                      |          |                             |                      |          |                               |                      |          |            |
|          | Therapeutic relationship                           | ✓✓                          | -                   | -        | ✓✓                            | -                    | -        | ✓✓                          | -                    | -        | ✓✓                            | -                    | -        | 33         |
|          | Cultural/diversity                                 | ✓✓                          | -                   | -        | ✓✓                            | -                    | -        | ✓✓                          | -                    | -        | ✓✓                            | -                    | -        | 33         |
|          | Environmental **                                   | ✓✓                          | -                   | -        | ✓✓                            | -                    | -        | ✓✓                          | -                    | -        | ✓✓                            | -                    | -        | 33         |



| No.                        | Theme and recommendation category                  | <i>Antenatal Assessment</i> |                     |          | <i>Antenatal Intervention</i> |                      |          | <i>Postnatal Assessment</i> |                      |          | <i>Postnatal Intervention</i> |                      |          | % coverage |
|----------------------------|----------------------------------------------------|-----------------------------|---------------------|----------|-------------------------------|----------------------|----------|-----------------------------|----------------------|----------|-------------------------------|----------------------|----------|------------|
|                            |                                                    | Women                       | Mother -infant dyad | Partners | Women                         | Mother - infant dyad | Partners | Women                       | Mother - infant dyad | Partners | Women                         | Mother - infant dyad | Partners |            |
| 6                          | <i>Therapeutic approaches in perinatal context</i> |                             |                     |          |                               |                      |          |                             |                      |          |                               |                      |          |            |
|                            | Psychosocial                                       | ✓                           | ✓                   | -        | ✓                             | ✓                    | -        | ✓                           | ✓                    | -        | ✓                             | ✓                    | -        | 33         |
|                            | Structured psychological                           | ✓                           | ✓                   | ✓        | ✓✓                            | ✓                    | ✓✓       | ✓                           | ✓                    | ✓        | ✓✓                            | ✓                    | ✓        | 63         |
|                            | Focus on specific MH conditions                    | ✓✓                          | -                   | -        | ✓✓                            | -                    | -        | ✓✓                          | -                    | -        | ✓✓                            | -                    | -        | 33         |
|                            | Trauma-informed                                    | ✓                           | ✓                   | ✓        | ✓                             | ✓                    | ✓        | ✓                           | ✓✓                   | ✓        | ✓                             | ✓                    | ✓        | 54         |
|                            | Use of validated questionnaires                    | ✓✓                          | -                   | -        | ✓                             | -                    | -        | ✓✓                          | -                    | -        | ✓                             | -                    | -        | 25         |
|                            | <i>Equitable care considerations</i>               |                             |                     |          |                               |                      |          |                             |                      |          |                               |                      |          |            |
|                            | Therapeutic relationship                           | ✓                           | ✓                   | ✓        | ✓                             | ✓                    | ✓        | ✓                           | ✓                    | ✓        | ✓                             | ✓                    | ✓        | 50         |
|                            | Cultural/diversity                                 | ✓                           | -                   | -        | ✓                             | -                    | -        | ✓                           | -                    | -        | ✓                             | -                    | -        | 17         |
|                            | Environmental **                                   | ✓                           | -                   | -        | ✓                             | -                    | -        | ✓                           | -                    | -        | ✓                             | -                    | -        | 17         |
|                            | <i>Individual and systemic considerations</i>      |                             |                     |          |                               |                      |          |                             |                      |          |                               |                      |          |            |
|                            | Recovery-oriented                                  | ✓                           | -                   | -        | ✓                             | -                    | -        | ✓                           | -                    | -        | ✓                             | -                    | -        | 17         |
|                            | Care planning                                      | ✓✓                          | ✓✓                  | -        | ✓                             | ✓                    | -        | ✓✓                          | ✓✓                   | -        | ✓                             | ✓                    | -        | 50         |
| Involve significant others | ✓✓                                                 | ✓✓                          | -                   | ✓        | ✓                             | -                    | ✓✓       | ✓✓                          | -                    | ✓        | ✓                             | -                    | 50       |            |
| Safety / Risk              | ✓✓                                                 | ✓✓                          | -                   | ✓        | ✓                             | -                    | ✓✓       | ✓✓                          | -                    | ✓        | ✓                             | -                    | 50       |            |
| 7                          | <i>Therapeutic approaches in perinatal context</i> |                             |                     |          |                               |                      |          |                             |                      |          |                               |                      |          |            |
|                            | Psychosocial                                       | ✓                           | ✓                   | ✓✓       | ✓                             | ✓                    | ✓✓       | ✓                           | ✓                    | ✓✓       | ✓                             | ✓                    | ✓✓       | 16         |
|                            | Structured psychological                           | ✓✓                          | ✓✓                  | ✓✓       | ✓                             | ✓                    | ✓        | ✓✓                          | ✓✓                   | ✓✓       | ✓                             | ✓                    | ✓        | 18         |
|                            | Focus on specific MH conditions                    | -                           | -                   | -        | -                             | -                    | -        | -                           | -                    | -        | -                             | -                    | -        | 0          |
|                            | Trauma-informed                                    | ✓                           | ✓                   | ✓        | ✓                             | -                    | -        | ✓                           | ✓                    | ✓        | ✓                             | -                    | -        | 8          |

| No.                                                          | Theme and recommendation category | <i>Antenatal Assessment</i> |                     |           | <i>Antenatal Intervention</i> |                      |          | <i>Postnatal Assessment</i> |                      |           | <i>Postnatal Intervention</i> |                      |           | % coverage |
|--------------------------------------------------------------|-----------------------------------|-----------------------------|---------------------|-----------|-------------------------------|----------------------|----------|-----------------------------|----------------------|-----------|-------------------------------|----------------------|-----------|------------|
|                                                              |                                   | Women                       | Mother -infant dyad | Partners  | Women                         | Mother - infant dyad | Partners | Women                       | Mother - infant dyad | Partners  | Women                         | Mother - infant dyad | Partners  |            |
|                                                              | Use of validated questionnaires   | -                           | -                   | -         | -                             | -                    | -        | -                           | -                    | -         | -                             | -                    | -         | 0          |
| <i>Equitable care considerations</i>                         |                                   |                             |                     |           |                               |                      |          |                             |                      |           |                               |                      |           |            |
|                                                              | Therapeutic relationship          | -                           | -                   | -         | -                             | -                    | -        | -                           | -                    | -         | -                             | -                    | -         | 0          |
|                                                              | Cultural/diversity                | ✓✓                          | ✓                   | ✓         | ✓✓                            | ✓                    | ✓        | ✓✓                          | ✓                    | ✓         | ✓✓                            | ✓                    | ✓         | 16         |
|                                                              | Environmental **                  | ✓✓                          | ✓                   | ✓✓        | ✓✓                            | ✓                    | ✓✓       | ✓✓                          | ✓                    | ✓✓        | ✓✓                            | ✓                    | ✓✓        | 20         |
| <i>Individual and systemic considerations</i>                |                                   |                             |                     |           |                               |                      |          |                             |                      |           |                               |                      |           |            |
|                                                              | Recovery-oriented                 | -                           | -                   | -         | -                             | -                    | -        | -                           | -                    | -         | -                             | -                    | -         | 0          |
|                                                              | Care planning                     | ✓✓                          | ✓✓                  | ✓✓        | ✓✓                            | ✓                    | ✓✓       | ✓✓                          | ✓✓                   | ✓✓        | ✓✓                            | ✓                    | ✓✓        | 22         |
|                                                              | Involve significant others        | ✓✓                          | ✓                   | ✓         | ✓✓                            | ✓                    | ✓        | ✓✓                          | ✓                    | ✓         | ✓✓                            | ✓                    | ✓         | 16         |
|                                                              | Safety / Risk                     | ✓                           | ✓                   | ✓         | -                             | -                    | ✓        | ✓                           | ✓                    | ✓         | -                             | -                    | ✓         | 8          |
| <b>Total % of coverage (rounded to nearest whole number)</b> |                                   | <b>60</b>                   | <b>26</b>           | <b>17</b> | <b>49</b>                     | <b>18</b>            | <b>9</b> | <b>60</b>                   | <b>24</b>            | <b>18</b> | <b>49</b>                     | <b>20</b>            | <b>15</b> |            |

1 – SIGN<sup>48</sup>

2 – Reproductive Mental Health Program & Perinatal Services BC<sup>60</sup>

3 – COPE<sup>51</sup>

4 – RNAO<sup>49</sup>

5 – Public Health Agency Canada<sup>61</sup>

6 – NICE<sup>50</sup>

7 – NHS England<sup>62</sup>
