# Supplementary material for: A systematic review of clinical psychological guidance for perinatal mental health
Source: Springer Nature journal article supplement (doi:10.1186/s12888-023-05173-1), 2023-10-30
Supplement: MOESM4 [file 26240424]

**Supplementary table 4: Raw scores for the AGREE-II tool across each of the seven guidelines**

|                                                     |                                                                   | DOMAINS                                                                       |                                                                                     |                                                                                                               |                                                                                                |                                                                                                  |                                                           |                                                         |                                                                   |                                                                                 |                                                                            |                                                                                                           |                                                                                        |                                                                                     |                                                         |                                                       |                                                                                                  |                                                  |                                                                           |                                                                                                     |                                                                                               |                                                                 |                                                                                     |                                                                                                  | Total score (max score = 161) |
|-----------------------------------------------------|-------------------------------------------------------------------|-------------------------------------------------------------------------------|-------------------------------------------------------------------------------------|---------------------------------------------------------------------------------------------------------------|------------------------------------------------------------------------------------------------|--------------------------------------------------------------------------------------------------|-----------------------------------------------------------|---------------------------------------------------------|-------------------------------------------------------------------|---------------------------------------------------------------------------------|----------------------------------------------------------------------------|-----------------------------------------------------------------------------------------------------------|----------------------------------------------------------------------------------------|-------------------------------------------------------------------------------------|---------------------------------------------------------|-------------------------------------------------------|--------------------------------------------------------------------------------------------------|--------------------------------------------------|---------------------------------------------------------------------------|-----------------------------------------------------------------------------------------------------|-----------------------------------------------------------------------------------------------|-----------------------------------------------------------------|-------------------------------------------------------------------------------------|--------------------------------------------------------------------------------------------------|-------------------------------|
|                                                     |                                                                   | Scope and purpose                                                             |                                                                                     |                                                                                                               | Stakeholder involvement                                                                        |                                                                                                  |                                                           | Rigour of development                                   |                                                                   |                                                                                 |                                                                            |                                                                                                           |                                                                                        | Clarity of presentation                                                             |                                                         |                                                       | Applicability                                                                                    |                                                  |                                                                           |                                                                                                     | Editorial independence                                                                        |                                                                 |                                                                                     |                                                                                                  |                               |
|                                                     |                                                                   | ITEM                                                                          |                                                                                     |                                                                                                               |                                                                                                |                                                                                                  |                                                           |                                                         |                                                                   |                                                                                 |                                                                            |                                                                                                           |                                                                                        |                                                                                     |                                                         |                                                       |                                                                                                  |                                                  |                                                                           |                                                                                                     |                                                                                               |                                                                 |                                                                                     |                                                                                                  |                               |
| Guideline organisation / society / publication year |                                                                   | 1. The overall objective(s) of the guideline is (are) specifically described. | 2. The health question(s) covered by the guideline is (are) specifically described. | 3. The population (patients, public, etc.) to whom the guideline is meant to apply is specifically described. | 4. The guideline development group includes individuals from all relevant professional groups. | 5. The views and preferences of the target population (patients, public, etc.) have been sought. | 6. The target users of the guideline are clearly defined. | 7. Systematic methods were used to search for evidence. | 8. The criteria for selecting the evidence are clearly described. | 9. The strengths and limitations of the body of evidence are clearly described. | 10. The methods for formulating the recommendations are clearly described. | 11. The health benefits, side effects, and risks have been considered in formulating the recommendations. | 12. There is an explicit link between the recommendations and the supporting evidence. | 13. The guideline has been externally reviewed by experts prior to its publication. | 14. A procedure for updating the guideline is provided. | 15. The recommendations are specific and unambiguous. | 16. The different options for management of the condition or health issue are clearly presented. | 17. Key recommendations are easily identifiable. | 18. The guideline describes facilitators and barriers to its application. | 19. The guideline provides advice and/or tools on how the recommendations can be put into practice. | 20. The potential resource implications of applying the recommendations have been considered. | 21. The guideline presents monitoring and/or auditing criteria. | 22. The views of the funding body have not influenced the content of the guideline. | 23. Competing interests of guideline development group members have been recorded and addressed. |                               |
| 1                                                   | SIGN (2012)                                                       | 7                                                                             | 7                                                                                   | 7                                                                                                             | 5                                                                                              | 5                                                                                                | 7                                                         | 4                                                       | 5                                                                 | 5                                                                               | 4                                                                          | 5                                                                                                         | 6                                                                                      | 5                                                                                   | 5                                                       | 5                                                     | 6                                                                                                | 7                                                | 1                                                                         | 4                                                                                                   | 5                                                                                             | 5                                                               | 1                                                                                   | 6                                                                                                | 117                           |
| 2                                                   | Reproductive Mental Health Program & Perinatal Services BC (2014) | 6                                                                             | 5                                                                                   | 7                                                                                                             | 6                                                                                              | 1                                                                                                | 6                                                         | 2                                                       | 1                                                                 | 2                                                                               | 2                                                                          | 4                                                                                                         | 5                                                                                      | 2                                                                                   | 1                                                       | 6                                                     | 7                                                                                                | 7                                                | 4                                                                         | 4                                                                                                   | 1                                                                                             | 6                                                               | 1                                                                                   | 1                                                                                                | 87                            |
| 3                                                   | COPE (2017)                                                       | 7                                                                             | 7                                                                                   | 7                                                                                                             | 7                                                                                              | 7                                                                                                | 7                                                         | 6                                                       | 7                                                                 | 7                                                                               | 7                                                                          | 7                                                                                                         | 7                                                                                      | 7                                                                                   | 7                                                       | 7                                                     | 7                                                                                                | 7                                                | 5                                                                         | 7                                                                                                   | 7                                                                                             | 6                                                               | 7                                                                                   | 7                                                                                                | 157                           |
| 4                                                   | RNAO (2018)                                                       | 7                                                                             | 7                                                                                   | 7                                                                                                             | 7                                                                                              | 7                                                                                                | 6                                                         | 7                                                       | 6                                                                 | 5                                                                               | 5                                                                          | 7                                                                                                         | 7                                                                                      | 7                                                                                   | 7                                                       | 7                                                     | 7                                                                                                | 7                                                | 5                                                                         | 5                                                                                                   | 5                                                                                             | 5                                                               | 7                                                                                   | 6                                                                                                | 146                           |
| 5                                                   | Public Health Agency of Canada (2020)                             | 6                                                                             | 7                                                                                   | 7                                                                                                             | 6                                                                                              | 1                                                                                                | 5                                                         | 7                                                       | 7                                                                 | 7                                                                               | 2                                                                          | 7                                                                                                         | 5                                                                                      | 3                                                                                   | 1                                                       | 7                                                     | 7                                                                                                | 4                                                | 7                                                                         | 7                                                                                                   | 1                                                                                             | 4                                                               | 1                                                                                   | 1                                                                                                | 110                           |
| 6                                                   | NICE (2020)                                                       | 7                                                                             | 7                                                                                   | 7                                                                                                             | 7                                                                                              | 7                                                                                                | 7                                                         | 6                                                       | 7                                                                 | 7                                                                               | 6                                                                          | 7                                                                                                         | 5                                                                                      | 6                                                                                   | 1                                                       | 5                                                     | 7                                                                                                | 6                                                | 4                                                                         | 5                                                                                                   | 5                                                                                             | 5                                                               | 1                                                                                   | 7                                                                                                | 132                           |
| 7                                                   | NHS England (2021)                                                | 7                                                                             | 6                                                                                   | 6                                                                                                             | 6                                                                                              | 5                                                                                                | 7                                                         | 5                                                       | 5                                                                 | 3                                                                               | 3                                                                          | 6                                                                                                         | 3                                                                                      | 5                                                                                   | 1                                                       | 6                                                     | 5                                                                                                | 6                                                | 5                                                                         | 6                                                                                                   | 4                                                                                             | 6                                                               | 4                                                                                   | 1                                                                                                | 111                           |
